# Supplementary material for: The Stress-Dependent Dynamics of Saccharomyces cerevisiae tRNA and rRNA Modification Profiles
Source: MDPI journal article supplement (doi:10.3390/genes12091344), 2021-08-28
Supplement: s1 [file s1]

## Article

# Stress-Dependent Dynamics of the *S. cerevisiae* tRNA and rRNA Modification Profile

Yasemin Yoluç<sup>1</sup>, Erik van de Logt<sup>1,2</sup> and Stefanie Kellner<sup>1,\*</sup>

<sup>1</sup> Department of Pharmaceutical Chemistry, Goethe University Frankfurt, Max-von-Laue str 9, 60438 Frankfurt; yoluc@pharmchem.uni-frankfurt.de

<sup>2</sup> Department of Chemistry, Ludwig-Maximilians University Munich, Butenandtstr. 5-13, 81377 Munich, Germany; vandelogt@genzentrum.lmu.de

\* Correspondence: Kellner@pharmchem.uni-frankfurt.de; Tel.: +49-069-798-29919

**Content:**

Figure S1: LD<sub>50</sub> for *S. cerevisiae* BY4741

Figure S2: detected damage products in total RNA after MMS treatment

Figure S3: comparative NAIL-MS for labeling validation of <sup>13</sup>C<sub>6</sub>-glucose and <sup>15</sup>N<sub>2</sub>-uracil labeling

Figure S4: comparison of SILIS<sup>Gen1</sup> and SILIS<sup>Gen2</sup>

Figure S5: High-resolution mass spectra of canonical nucleosides in SILIS<sup>Gen2</sup>

Figure S6: Methylome discrimination based pulse chase experiment, modification levels of m<sup>3</sup>C and m<sup>7</sup>G

Figure S7: examination of knock out strains

Figure S8: Absolute abundance of modified nucleosides per original tRNA from NAIL-MS pulse chase experiment.

Figure S9: NAIL-MS pulse chase experiment, levels of i6A and t6A after AsO<sub>2</sub> and TBH treatment

Table S1: Overview of used synthetic standards

Table S2: absolute number of enzymatically and damage methylated nucleosides in 25S, 18S rRNA and tRNA

Table S3: absolute modifications levels in total RNA after MMS treatment in knock out strains

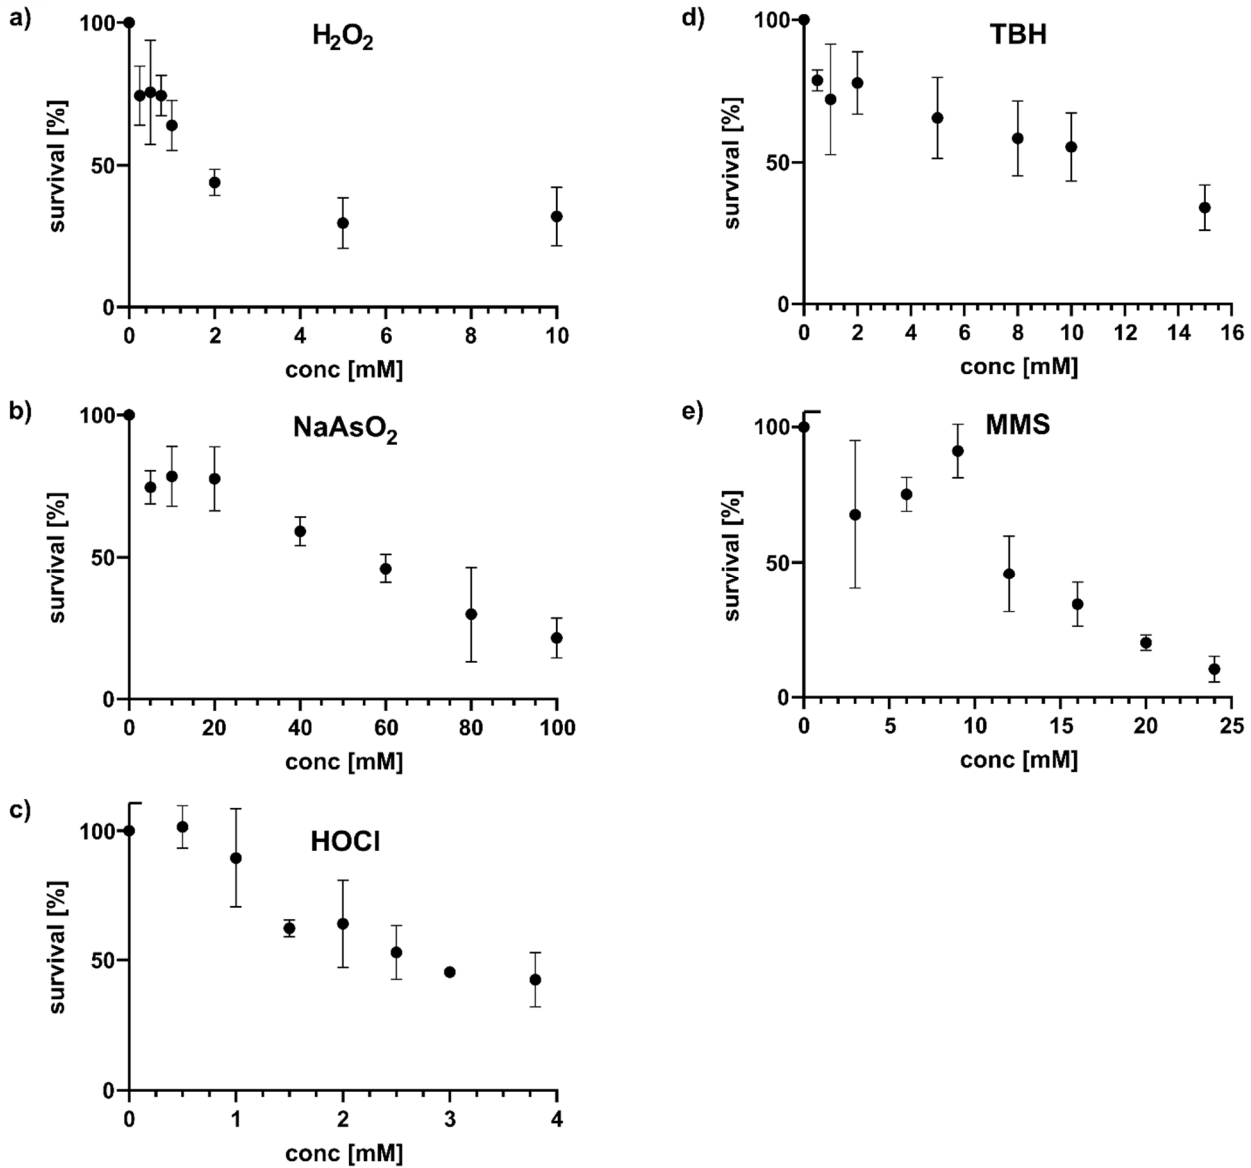

**Figure S1:** LD<sub>50</sub> for *S. cerevisiae* BY4741 after 60 min of stress exposure to chemicals with different concentrations a) H<sub>2</sub>O<sub>2</sub>: hydrogen peroxide; 0, 0.25, 0.5, 0.75, 1, 2, 5, 10 mM b) NaAsO<sub>2</sub>: sodium arsenite; 0, 5, 10, 20, 40, 60, 80, 100 mM c) HOCl: hypochloric acid; 0, 0.5, 1, 1.5, 2, 2.5, 3, 3.8 mM d) TBH: tert-butyl hydroperoxide; 0, 0.5, 1, 2, 5, 8, 10, 15 mM e) MMS: methyl-methanesulfonate; 0, 3, 6, 9, 12, 16, 20, 24 mM; determined LD<sub>50</sub> concentrations: H<sub>2</sub>O<sub>2</sub> (2 mM), NaAsO<sub>2</sub>(40 mM), HOCl (3 mM), MMS (12 mM), TBH (10 mM); data from n=3 biological replicates with standard deviation

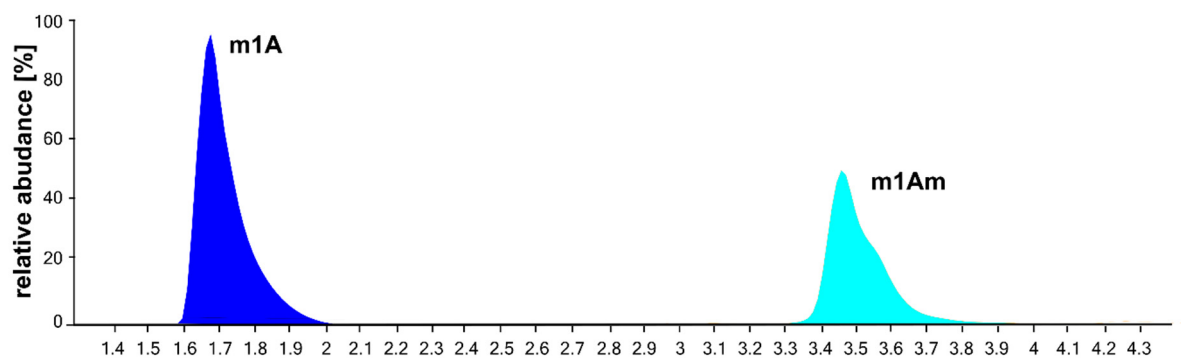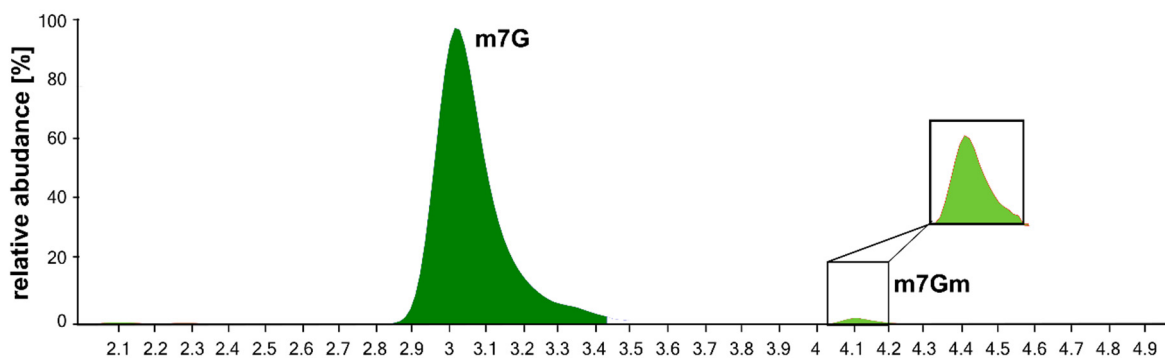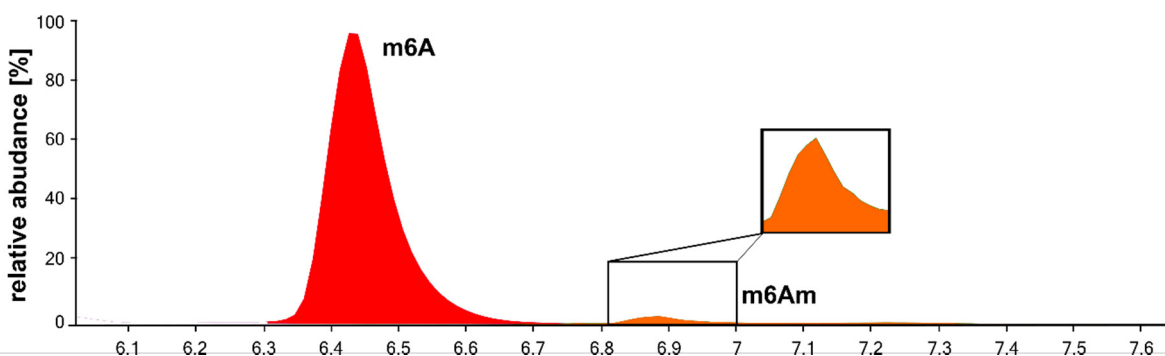

Figure S2: Overlay of chromatograms from found damage products in total RNA after MMS treatment for 60 min. Peaks were scaled to largest in each chromatogram, m<sup>3</sup>C (Rt: 1.65 min), m<sup>1</sup>A (Rt: 1.67 min), m<sup>7</sup>G (Rt: 3.02 min), m<sup>1</sup>Am (Rt: 3.46 min), m<sup>7</sup>Gm (Rt: 4.11 min), m<sup>6</sup>A (Rt: 6.43), m<sup>6</sup>Am (Rt: 6.90 min)

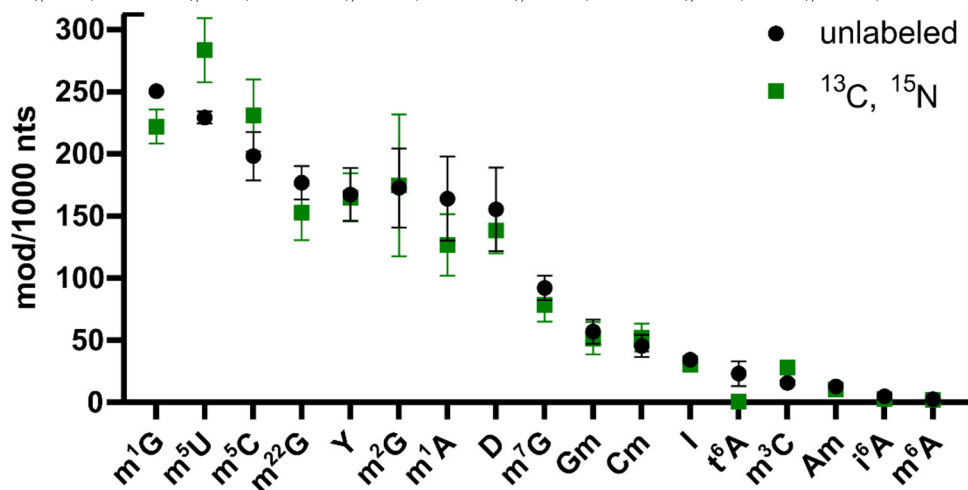

Figure S3: comparative NAIL-MS of total RNA for labeling validation of <sup>13</sup>C<sub>6</sub>-glucose and <sup>15</sup>N<sub>2</sub>-uracil labeling (green) in comparison to unlabeled RNA (black), data from n=2 biological replicates with standard deviation

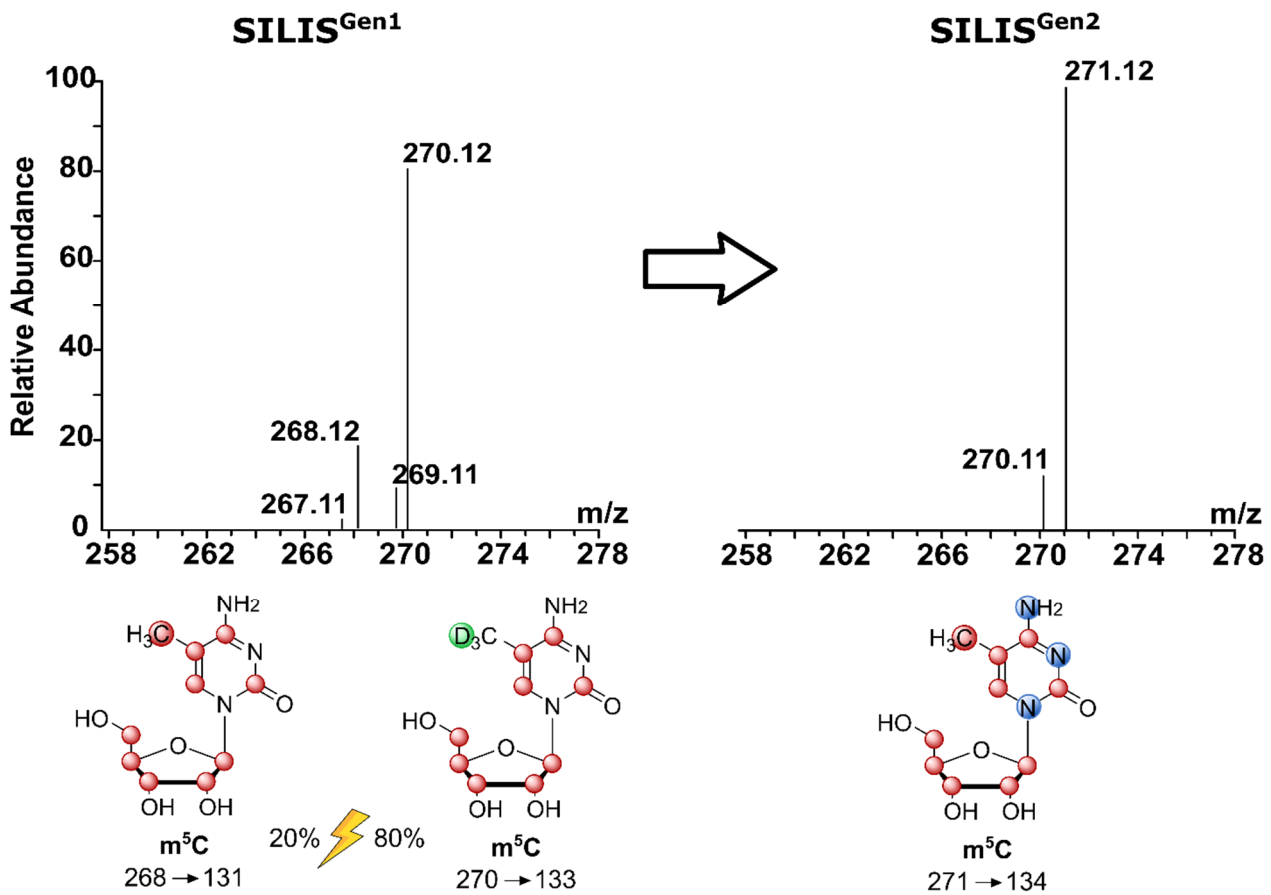

**Figure S4:** Improvement of defined labeling of methylated nucleosides in SILIS<sup>Gen2</sup>. Left: SILIS<sup>Gen1</sup> was labeled using  $^{13}C$  Silantes rich growth medium supplemented with  $^{13}C$ -glucose and L-methionine- $[^2H_3]$ -methyl which led to incomplete labeling of methylated nucleosides. Right: SILIS<sup>Gen2</sup> was labeled using  $^{13}C$ ,  $^{15}N$  Silantes rich growth medium supplemented with  $^{13}C$ -glucose where all respective atoms are  $^{13}C$ - and  $^{15}N$ -labeled.

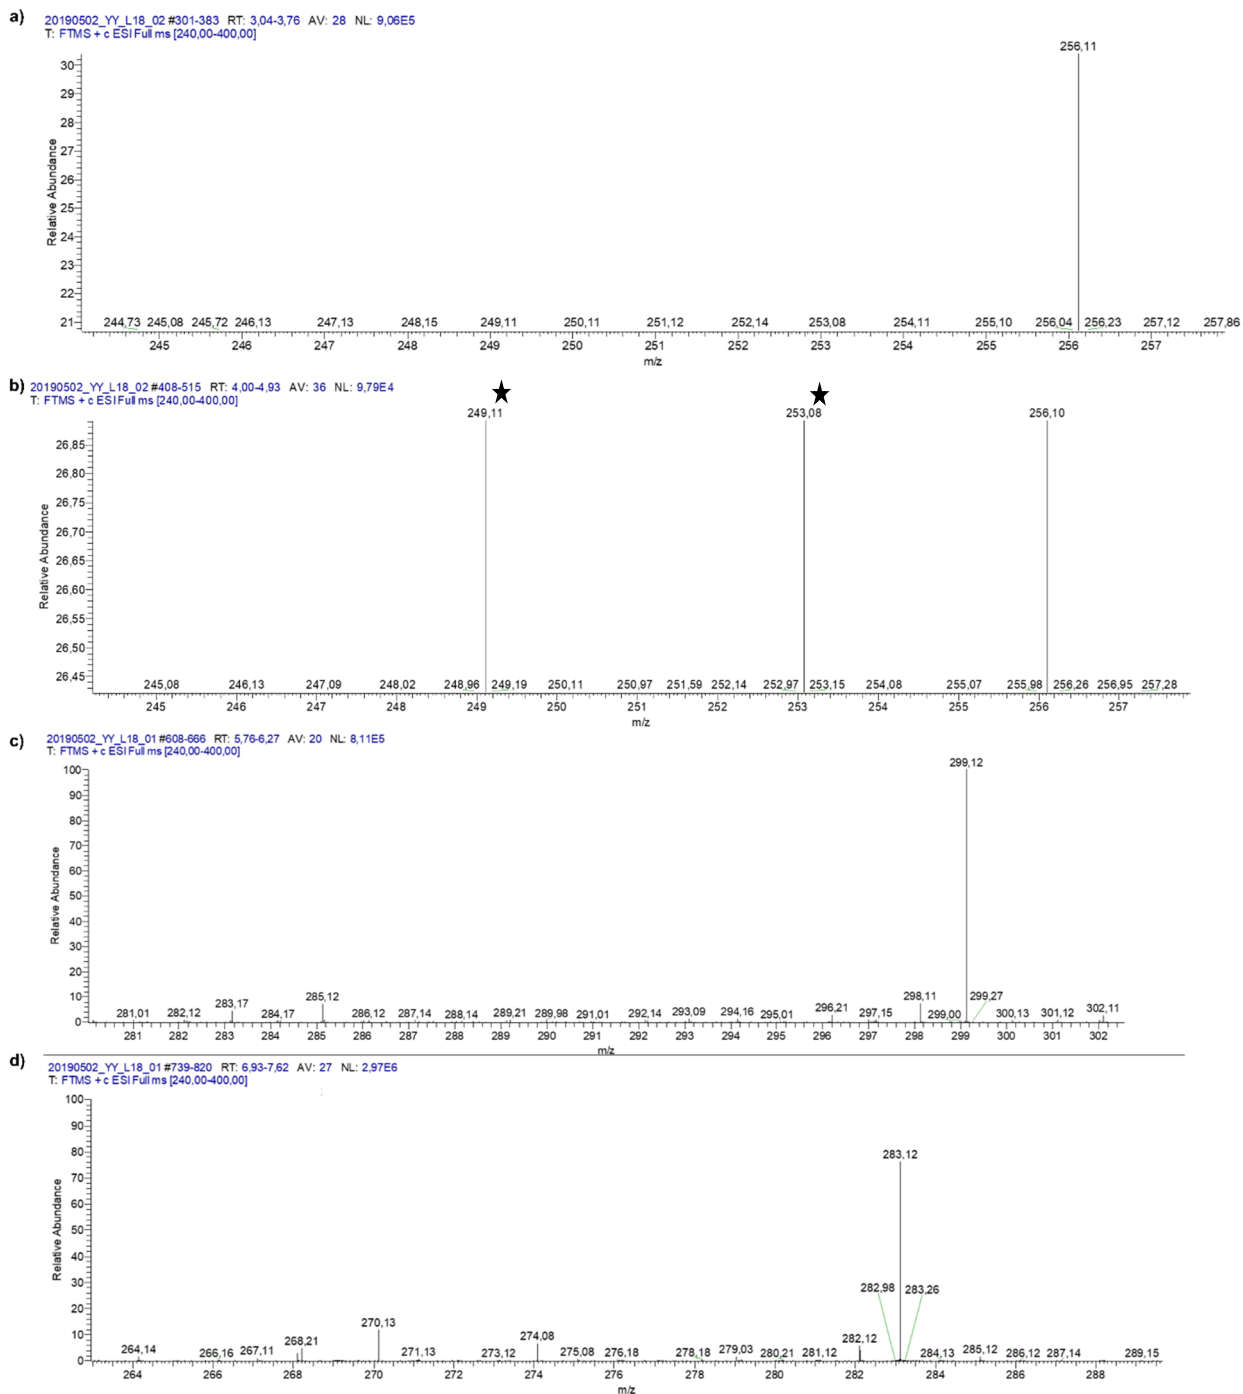

Figure S5: High-resolution mass spectra of SILIS<sup>Gen2</sup> shows representative nucleosides from the produced labeled RNA digests. a) cytosine  $m/z$  256.11 b) uridine  $m/z$  256.10; \* indicates background contaminations c) guanosine  $m/z$  299.12 d) adenosine  $m/z$  283.12

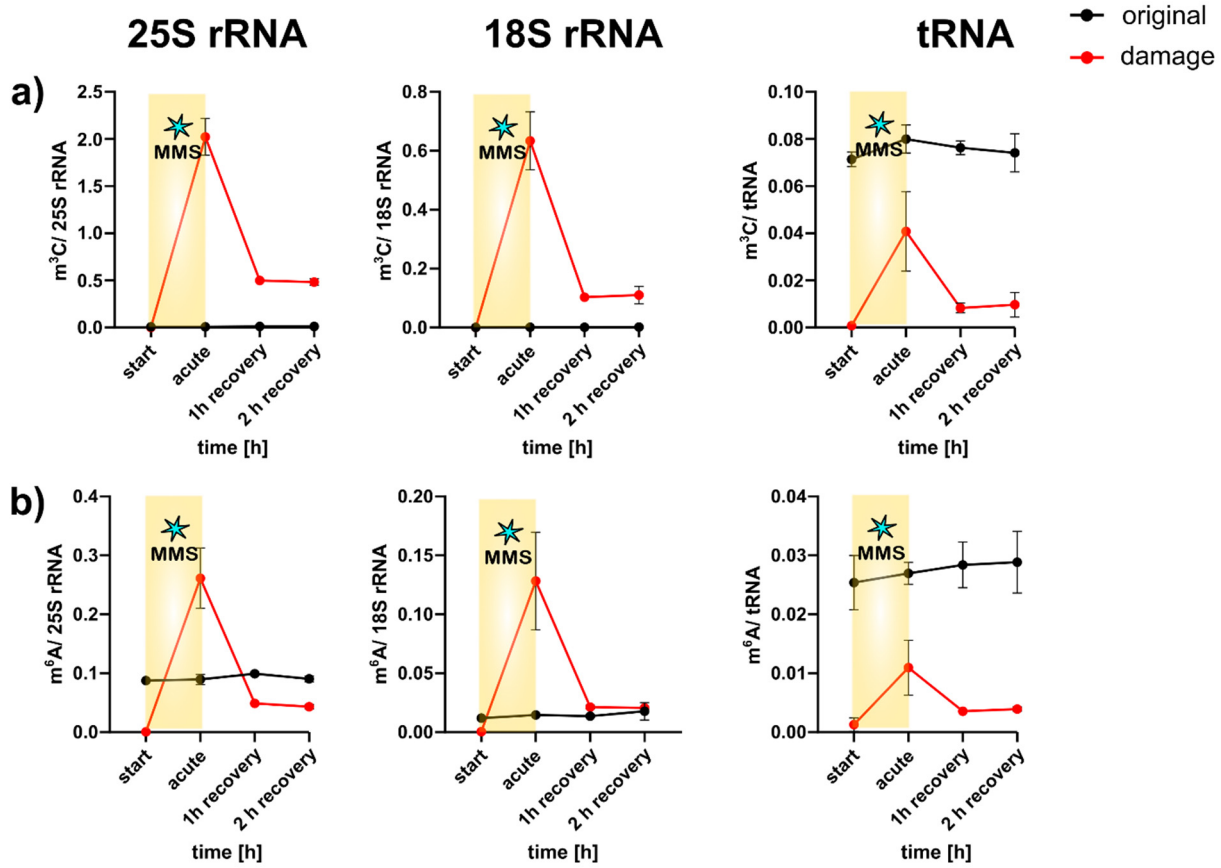

**Figure S6:** Methylome discrimination based pulse chase experiment (a) number of  $m^3C$  per respective RNA (b) number of  $m^6A$  per respective RNA, red line shows damage induced methylation level, black line shows enzymatic methylation, data for tRNA from  $n=3$  biological replicates with standard deviations, data for 25S and 18S rRNA from  $n=2$  biological replicates with standard deviation

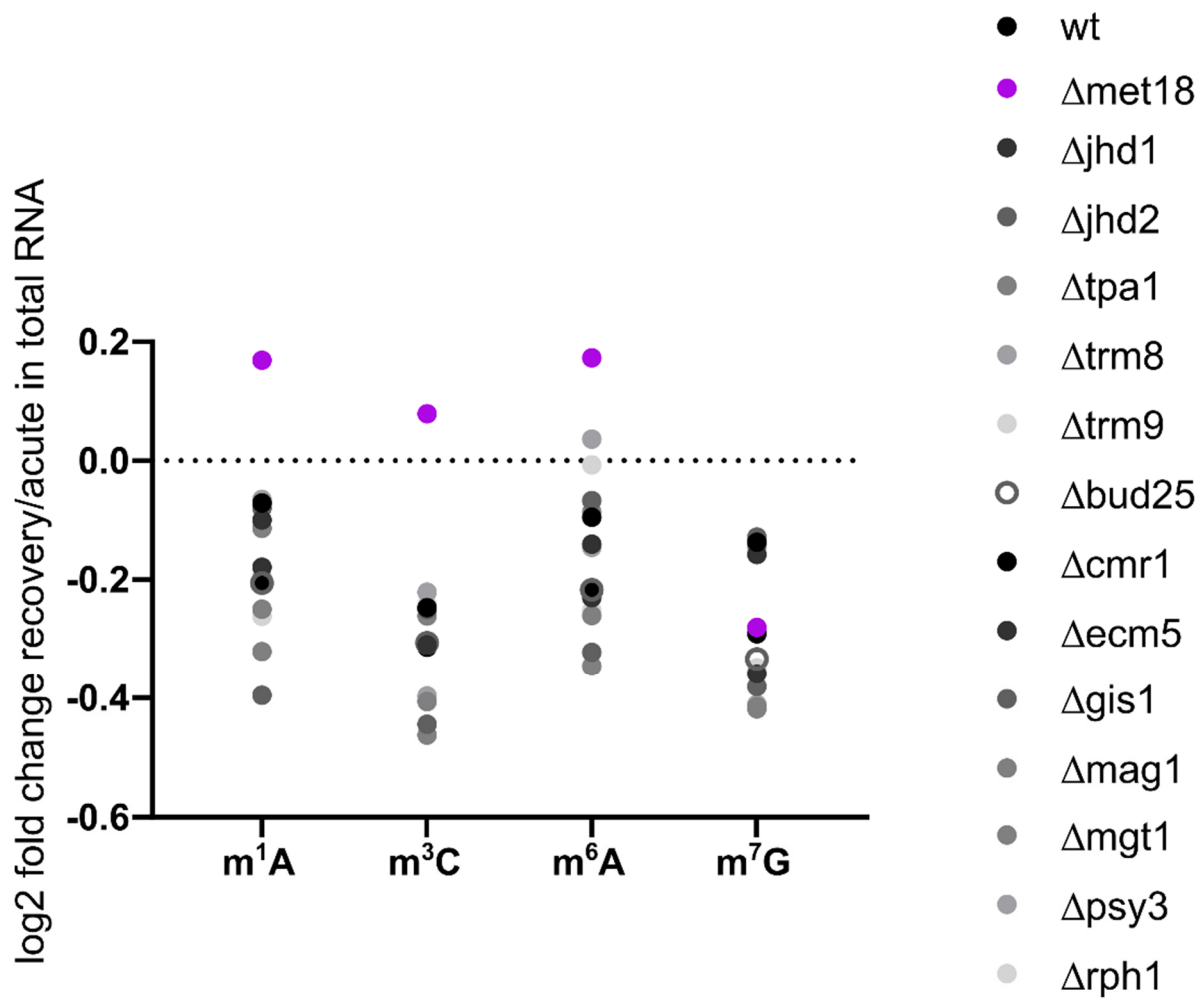

Figure S7: log<sub>2</sub> fold change from nucleoside abundance in acute stress phase in contrast to 1h recovery, Y < 0 indicates decrease of nucleoside level in recovery and Y > 0 indicates increase of nucleoside level in recovery, data from one biological replicate

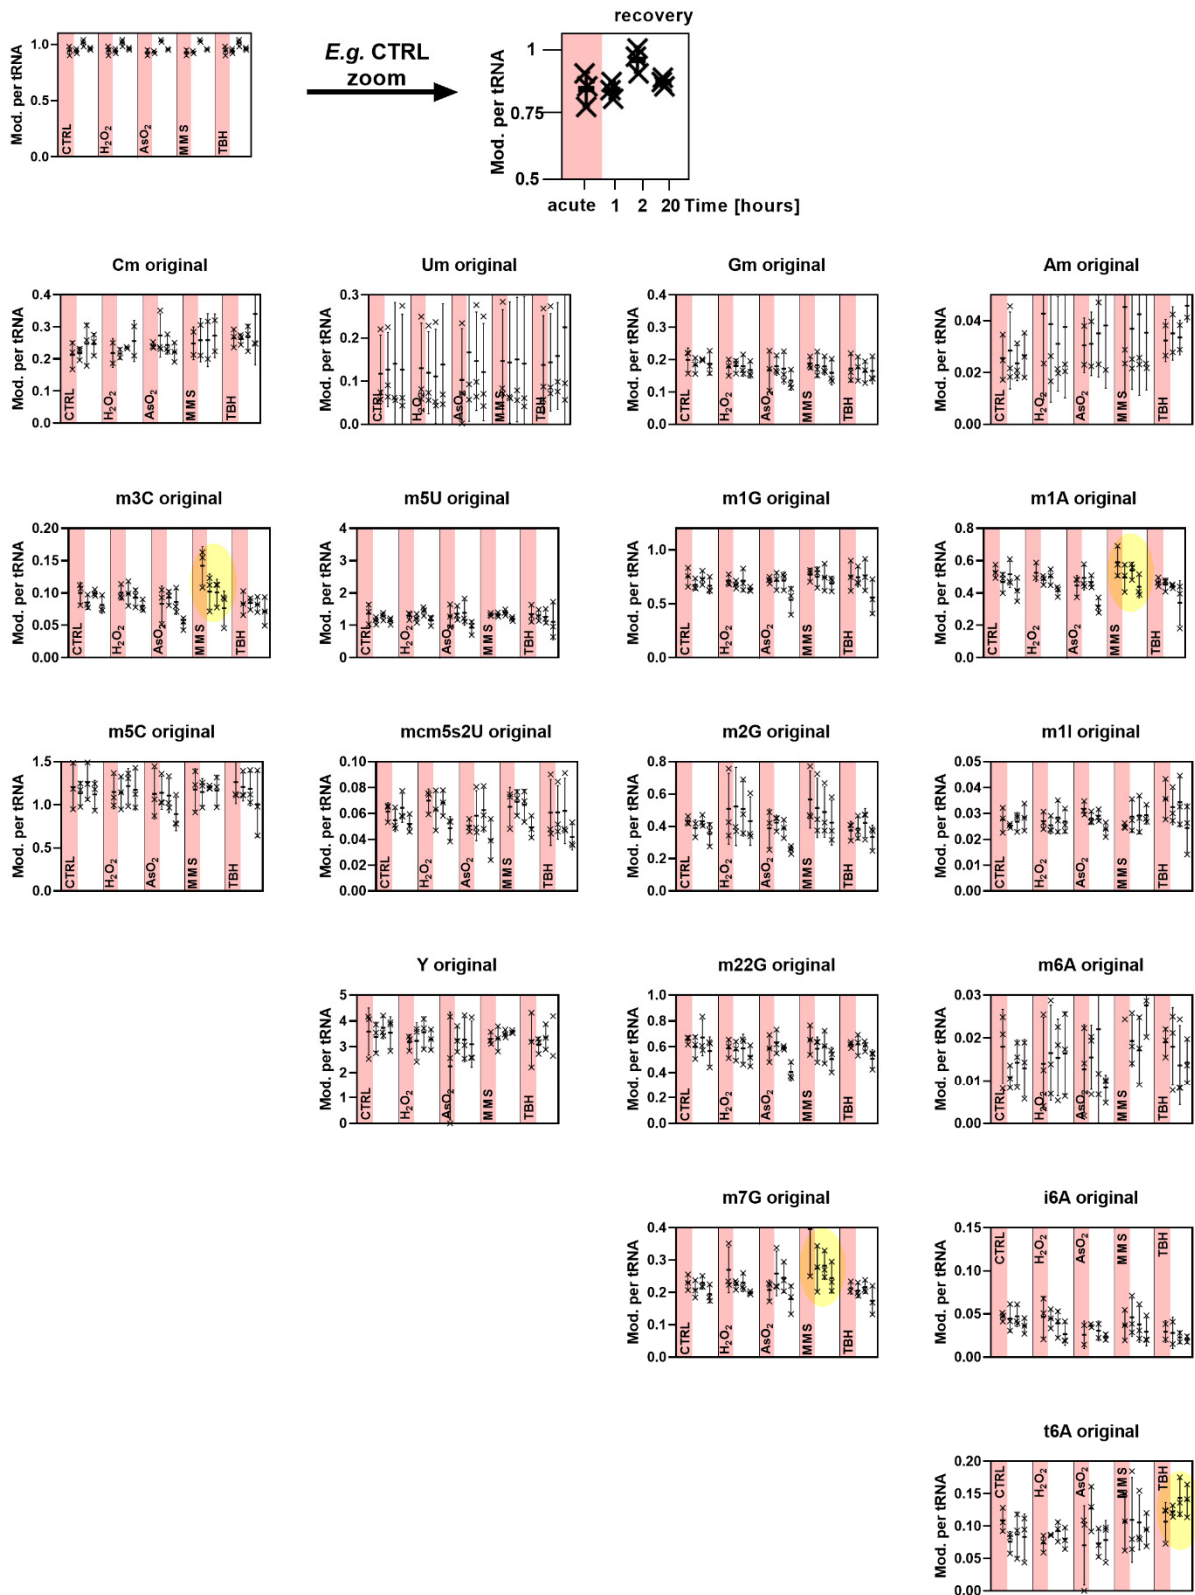

Figure S8: Absolute abundance of modified nucleosides per original tRNA from NAIL-MS pulse chase experiment. Stress exposure phase (acute) is highlighted in red and recovery timepoints (1, 2 and 20 hrs) in white. Top plot gives an explanation for a fictive dataset. Yellow circles highlight interesting abundance changes in original tRNAs.



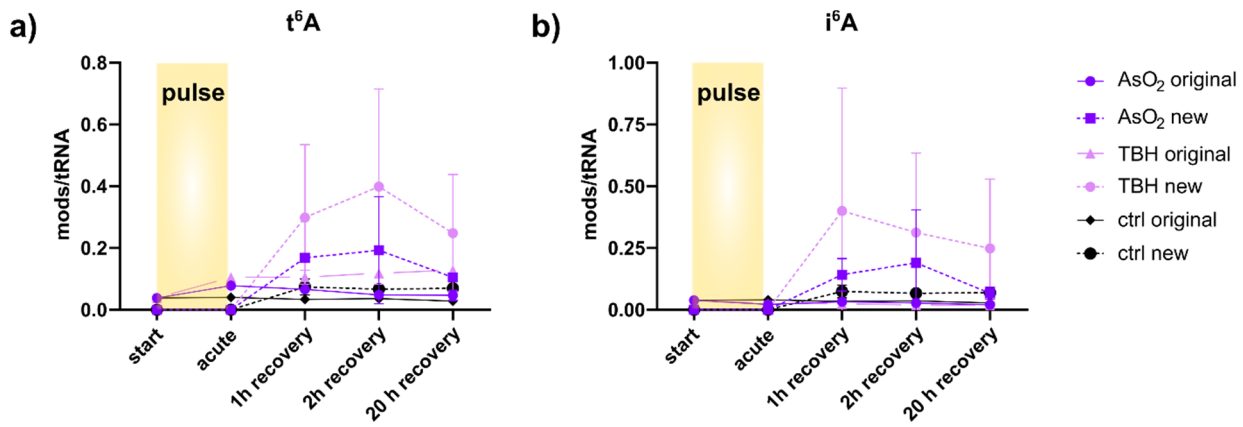

Figure S9: NAIL-MS pulse chase experiment (a) comparison of original (solid line) and new (dashed lines) transcripts of ctrl (black), AsO<sub>2</sub> (violet) and TBH (pink) exposed yeast cultures. data from n=2 biological replicates with error bars reflecting standard deviation.

**Table S1:** Overview of used synthetic standards, their vendors and alternative vendors. Sigma: Sigma, Aldrich, Munich, Germany; Carbosynth, Newbury, UK; TRC: Toronto Research Chemicals, Toronto, CA; Berry & Associates, Dexter, MI, USA.

| <b>Nucleoside</b>                            | <b>Abbreviation</b> | <b>Obtained from:</b> | <b>Also available from:</b> |
|----------------------------------------------|---------------------|-----------------------|-----------------------------|
| <b>cytidine</b>                              | C                   | Sigma                 |                             |
| <b>2' -O-methylcytidine</b>                  | Cm                  | Carbosynth            |                             |
| <b>3-methylcytidine</b>                      | m3C                 | Carbosynth            | Carbo and TRC               |
| <b>5-methylcytidine</b>                      | m5C                 | Carbosynth            |                             |
| <b>2-thiocytidine</b>                        | s2C                 | Berry & Associates    |                             |
| <b>N4-acetylcytidine</b>                     | ac4C                | Carbosynth            |                             |
| <b>pseudouridine</b>                         | Y                   | Carbosynth            |                             |
| <b>uridine</b>                               | U                   | Sigma                 |                             |
| <b>dihydrouridine</b>                        | D                   | Apollo scientific, UK |                             |
| <b>2' -O-methyluridine</b>                   | Um                  | Carbosynth            |                             |
| <b>3-methyluridine</b>                       | m3U                 | Dedon Lab             |                             |
| <b>5-methyluridine</b>                       | m5U                 | Carbosynth            |                             |
| <b>4-thiouridine</b>                         | s4U                 | ordered from TRC      |                             |
| <b>5-methoxycarbonylmethyl-2-thiouridine</b> | mcm5s2U             | Helm Lab              |                             |
| <b>guanosine</b>                             | G                   | Sigma                 |                             |
| <b>1-methylguanosine</b>                     | m1G                 |                       |                             |
| <b>2' -O-methylguanosine</b>                 | Gm                  | Carbosynth            |                             |
| <b>N2-methylguanosine</b>                    | m2G                 | Dedon Lab             |                             |
| <b>7-methylguanosine</b>                     | m7G                 | Carbosynth            |                             |
| <b>N2,N2-dimethylguanosine</b>               | m2,2G               | Carbosynth            |                             |
| <b>adenosine</b>                             | A                   | Sigma                 |                             |
| <b>inosine</b>                               | I                   | Carbosynth            |                             |
| <b>1-methyladenosine</b>                     | m1A                 |                       | Carbosynth                  |
| <b>2-methyladenosine</b>                     | m2A                 | Dedon Lab             |                             |
| <b>2' -O-methyladenosine</b>                 | Am                  | Carbosynth            | Carbo and TRC               |
| <b>N6-methyladenosine</b>                    | m6A                 | Carbosynth            | Carbo, TRC and B&A          |
| <b>N6,N6-dimethyladenosine</b>               | m6,6A               | Alfa Chemistry        | TRC                         |
| <b>N6-isopentenyladenosine</b>               | i6A                 | Dedon Lab             | TRC                         |
| <b>N6-threonylcarbamoyladenosine</b>         | t6A                 | TRC                   | TRC                         |

**Table S2:** Comparison of *S. cerevisiae* 18S and 25S rRNA modification levels determined in this work and literature [Yang, J. et al. Mapping of complete set of ribose and base modifications of yeast rRNA by RPHPLC and mung bean nuclease assay. PLoS one 11, e0168873 (2016).; Lovejoy, A. F., Riordan, D. P. & Brown, P. O. Transcriptome-wide mapping of pseudouridines: pseudouridine synthases modify specific mRNAs in *S. cerevisiae*. PLoS one 9, e110799 (2014).], data from n=10 biological replicates with standard deviation, n.d. = not detected.

| Modification                           | literature |        | experimental                                |                                             |
|----------------------------------------|------------|--------|---------------------------------------------|---------------------------------------------|
|                                        | 18S        | 25S    | 18S                                         | 25S                                         |
| Cm                                     | 3          | 7      | $3.06 \pm 0.34$                             | $6.78 \pm 0.90$                             |
| Um                                     | 2          | 8      | $1.90 \pm 0.30$                             | $6.44 \pm 1.05$                             |
| Gm                                     | 5          | 10     | $4.34 \pm 0.55$                             | $8.43 \pm 1.25$                             |
| Am                                     | 8          | 12     | $6.03 \pm 1.12$                             | $8.84 \pm 3.24$                             |
| $\Psi$                                 | 13         | 30     | $12.24 \pm 1.64$                            | $27.27 \pm 3.32$                            |
| ac <sup>4</sup> C                      | 2          | absent | $1.23 \pm 0.32$                             | $0.15 \pm 0.14$                             |
| m <sup>7</sup> G                       | 1          | absent | $0.77 \pm 9.85 \cdot 10^{-2}$               | $4.7 \cdot 10^{-2} \pm 1.42 \cdot 10^{-2}$  |
| m <sup>6</sup> <sub>2</sub> A          | 2          | absent | $0.75 \pm 1.52 \cdot 10^{-2}$               | $2.38 \cdot 10^{-2} \pm 4.84 \cdot 10^{-3}$ |
| m <sup>1</sup> acp <sup>3</sup> $\Psi$ | 1          | absent | n.d.                                        | n.d.                                        |
| m <sup>5</sup> C                       | absent     | 2      | $0.13 \pm 5.27 \cdot 10^{-2}$               | $1.84 \pm 0.37$                             |
| m <sup>3</sup> U                       | absent     | 2      | $0.11 \pm 3.50 \cdot 10^{-2}$               | $1.50 \pm 0.32$                             |
| m <sup>1</sup> A                       | absent     | 2      | $0.15 \pm 7.76 \cdot 10^{-2}$               | $1.90 \pm 0.20$                             |
| m <sup>3</sup> C                       | absent     | absent | $4.12 \cdot 10^{-4} \pm 4.05 \cdot 10^{-4}$ | $6.10 \cdot 10^{-3} \pm 3.53 \cdot 10^{-3}$ |
| m <sup>6</sup> A                       | absent     | absent | $2.04 \cdot 10^{-2} \pm 7.28 \cdot 10^{-3}$ | $0.14 \pm 3.12 \cdot 10^{-2}$               |
| m <sup>6</sup> Am                      | absent     | absent | $1.40 \cdot 10^{-4} \pm 3.10 \cdot 10^{-4}$ | $1.50 \cdot 10^{-4} \pm 4.50 \cdot 10^{-2}$ |

**Table S3:** absolute number of enzymatically placed methylation (original, blue) and damage methylation (damage, red) per respective RNA after 60 min of MMS treatment (n=2)

|                 |                 | m <sup>1</sup> A |            | m <sup>3</sup> C |            | m <sup>6</sup> A |            | m <sup>7</sup> G |            |
|-----------------|-----------------|------------------|------------|------------------|------------|------------------|------------|------------------|------------|
| <b>tRNA</b>     | <b>original</b> | 0.656<br>8       | 0.554<br>2 | 0.086<br>5       | 0.078<br>6 | 0.026<br>2       | 0.029<br>1 | 0.368<br>2       | 0.316<br>3 |
|                 | <b>damage</b>   | 0.302<br>7       | 0.184<br>2 | 0.056<br>0       | 0.043<br>8 | 0.014<br>6       | 0.012<br>6 | 0.586<br>4       | 0.384<br>1 |
| <b>25S rRNA</b> | <b>original</b> | 1.952<br>2       | 1.953<br>9 | 0.002<br>9       | 0.003<br>9 | 0.097<br>3       | 0.133<br>8 | 0.047<br>7       | 0.043<br>8 |
|                 | <b>damage</b>   | 1.752<br>8       | 1.987<br>6 | 0.531<br>5       | 0.639<br>1 | 0.099<br>2       | 0.147<br>1 | 7.725<br>0       | 8.106<br>8 |
| <b>18S rRNA</b> | <b>original</b> | 0.175<br>5       | 0.177<br>5 | 0.000<br>5       | 0.000<br>4 | 0.016<br>3       | 0.016<br>2 | 0.801<br>8       | 0.747<br>8 |
|                 | <b>damage</b>   | 0.856<br>1       | 0.935<br>1 | 0.308<br>5       | 0.347<br>5 | 0.059<br>2       | 0.061<br>8 | 3.226<br>2       | 3.251<br>3 |

**Table S4:** absolute number of modification per G in total RNA after 60 min of MMS exposure (acute, yellow) and after 1h of recovery (green) in different strains of *S. cerevisiae* BY4741 (n=1)

|                    | m1A         |                  | m3C         |                  | m6A         |                  | m7G         |                  |
|--------------------|-------------|------------------|-------------|------------------|-------------|------------------|-------------|------------------|
|                    | acute       | 1h re-<br>covery |
| <b>wt</b>          | 0.010<br>03 | 0.00802          | 0.002<br>62 | 0.00149          | 0.001<br>08 | 0.00065          | 0.013<br>73 | 0.00845          |
| <b>Δjhd1</b>       | 0.008<br>85 | 0.00703          | 0.002<br>64 | 0.00130          | 0.000<br>58 | 0.00042          | 0.011<br>84 | 0.00824          |
| <b>Δjhd2</b>       | 0.008<br>83 | 0.00735          | 0.002<br>44 | 0.00137          | 0.000<br>29 | 0.00050          | 0.011<br>57 | 0.00860          |
| <b>Δtpa1</b>       | 0.009<br>05 | 0.00696          | 0.002<br>38 | 0.00131          | 0.009<br>59 | 0.00052          | 0.011<br>33 | 0.00818          |
| <b>Δtrm<br/>8</b>  | 0.007<br>82 | 0.00673          | 0.002<br>14 | 0.00128          | 0.008<br>28 | 0.00048          | 0.008<br>10 | 0.00580          |
| <b>Δtrm<br/>9</b>  | 0.010<br>31 | 0.00864          | 0.002<br>66 | 0.00153          | 0.007<br>89 | 0.00054          | 0.000<br>53 | 0.15220          |
| <b>Δbud<br/>25</b> | 0.010<br>47 | 0.00648          | 0.002<br>45 | 0.00121          | 0.001<br>04 | 0.00063          | 0.012<br>35 | 0.00881          |
| <b>Δcmr<br/>1</b>  | 0.011<br>50 | 0.00731          | 0.002<br>68 | 0.00130          | 0.001<br>01 | 0.00061          | 0.015<br>15 | 0.00775          |
| <b>Δecm<br/>5</b>  | 0.011<br>23 | 0.00728          | 0.002<br>73 | 0.00136          | 0.001<br>12 | 0.00066          | 0.015<br>88 | 0.00695          |
| <b>Δgis1</b>       | 0.015<br>02 | 0.00636          | 0.003<br>31 | 0.00119          | 0.001<br>36 | 0.00065          | 0.017<br>45 | 0.00726          |
| <b>Δmag<br/>1</b>  | 0.005<br>91 | 0.00330          | 0.001<br>91 | 0.00075          | 0.000<br>60 | 0.00033          | 0.015<br>43 | 0.00594          |
| <b>Δmet<br/>18</b> | 0.004<br>93 | 0.00740          | 0.001<br>65 | 0.00140          | 0.000<br>41 | 0.00062          | 0.016<br>13 | 0.00846          |
| <b>Δmgt<br/>1</b>  | 0.006<br>22 | 0.00306          | 0.002<br>06 | 0.00071          | 0.000<br>58 | 0.00026          | 0.016<br>79 | 0.00641          |
| <b>Δpsy<br/>3</b>  | 0.004<br>60 | 0.00285          | 0.001<br>52 | 0.00061          | 0.000<br>40 | 0.00029          | 0.013<br>72 | 0.00532          |
| <b>Δrph<br/>1</b>  | 0.005<br>59 | 0.00315          | 0.001<br>85 | 0.00073          | 0.000<br>49 | 0.00027          | 0.013<br>72 | 0.00532          |
